# Supplementary material
Source: Springer Nature journal article supplement (https://www.springermedizin.de/resource/supplementary/12943_2013_1159_MOESM2_ESM.pdf/9552634)

A

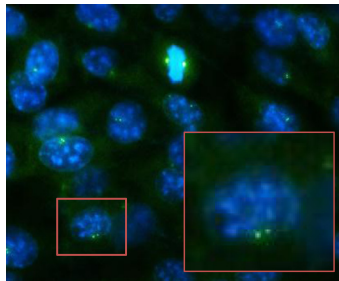*Klf4*<sup>+/+</sup>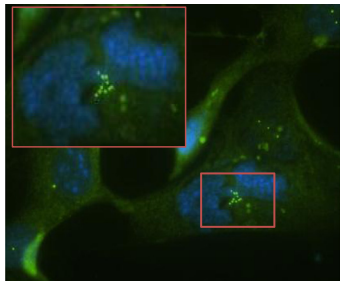*Klf4*<sup>-/-</sup>

B

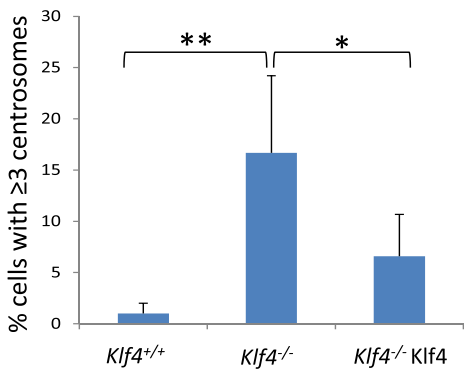

C

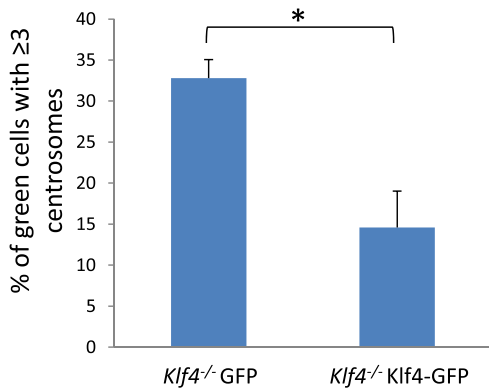

Supplement: MOESM2 [file 9552634]
